# Supplementary material
Source: PubMed Central journal article supplement (PMC2277056)
Supplement: jphysiol_2007.136119_2.pdf [file jphysiol_2007.136119_2.pdf]

| Construct                                                                    | N  | Primer name                                 | AE                                                                                                            | Nucleotides (5'-3')                                                          | Sequence                                                                                                                                                                          | Restriction enzymes                                                                                                                             | Vector     |
|------------------------------------------------------------------------------|----|---------------------------------------------|---------------------------------------------------------------------------------------------------------------|------------------------------------------------------------------------------|-----------------------------------------------------------------------------------------------------------------------------------------------------------------------------------|-------------------------------------------------------------------------------------------------------------------------------------------------|------------|
| AE2a Δ659 (660-1237)                                                         | 1  | AKS-C-term<br>PXT7 rev                      | AE2<br>AE2                                                                                                    | 2157-2178                                                                    | 5'-CCGGAATTCAGATTTGGCCATG<br>GTAGAGGTGGCAGGTGCAG-3'                                                                                                                               | <i>EcoRI/BsrGI</i>                                                                                                                              | PXT7       |
| *AE1 <sub>(1-422)</sub> /AE2 <sub>(704-1237)</sub>                           | 2  |                                             |                                                                                                               |                                                                              | (Zhang <i>et al.</i> , 1996)                                                                                                                                                      |                                                                                                                                                 |            |
| AE2 <sub>(1-1119)</sub> /AE1 <sub>(812-929)</sub>                            | 3  |                                             |                                                                                                               |                                                                              | N.A.<br>Ligation of restriction fragments                                                                                                                                         | Digest AE2a (PXT7) - <i>BsrGI/XbaI</i> and<br>AE2 <sub>(1-920)</sub> /AE1 <sub>(613-929)</sub> with <i>BsrGI/XbaI</i>                           | PXT7       |
| AE2 <sub>(1-920)</sub> /AE1 <sub>(613-929)</sub>                             | 4  | AE1.F1<br>T7<br>AE2.R2<br>SZ-14             | AE1<br>AE1<br>AE2<br>AE2                                                                                      | 2922-2942/<br>1963-1983<br>1983-1963/<br>2942-2922<br>2157-2178              | 5'-CTGCGCAAGTTCAAGAACAGC-<br>ACCTACTTCCCTGGCAAGCTG-3'<br>5'-TAATACGACTCACTATAGGG - 3<br>5'-CAGCTTGCCAGGGAAGTAGGT-<br>GTTCTTGAACCTGCGCAG-3'<br>5'-ATGGTAGAGGTGGCAGGTGCAG-3'        | Digest AE2a (PXT7) - <i>StuI/SpeI</i> and<br>PCR fragment <i>StuI/AvrII</i>                                                                     | PXT7       |
| AE2 <sub>(1-920)</sub> /AE1 <sub>(613-811)</sub> /AE2 <sub>(1120-1237)</sub> | 5  |                                             |                                                                                                               |                                                                              | N.A.<br>Ligation of restriction fragments                                                                                                                                         | Digest AE2a PΔX - <i>SbfI/BsrGI</i> and<br>AE2 <sub>(1-920)</sub> /AE1 <sub>(613-929)</sub><br><i>SbfI/BsrGI</i>                                | PΔX        |
| AE2 <sub>(1-703)</sub> /AE1 <sub>(423-811)</sub> /AE2 <sub>(1120-1237)</sub> | 6  |                                             |                                                                                                               |                                                                              | N.A.<br>Ligation of restriction fragments                                                                                                                                         | Digest AE2a PΔX - <i>SbfI/BsrGI</i> and<br>*AE2 <sub>cyto</sub> /AE1 <sub>mem</sub> -<br><i>SbfI/BsrGI</i>                                      | PΔX        |
| AE2 <sub>(1-703)</sub> /AE1 <sub>(423-612)</sub> /AE2 <sub>(921-1237)</sub>  | 7  | AE2.F2<br>SZ-18<br>AKS2.F4<br>AE1.R1        | AE1 <sub>(1-612)</sub> /<br>AE2 <sub>(921-1237)</sub><br>AE2 <sub>(1-703)</sub> /<br>AE1 <sub>(423-929)</sub> | 1942-1962/<br>2943-2963<br>3876-3896<br>1557-1577<br>2943-2963/<br>1942-1962 | 5'-CTACGAAAGTTCAAGAACAGC-<br>CGGTTCTTCCCTGGCCGGATC-3'<br>5'-CTACACAGGCATGGGCATCTC-3'<br>5'-CCTCATGTCACTGAGCCTCTC-3'<br>5'-GATCCGGCCAGGGAAGAACCG-<br>GCTGTTCTTGAACCTTTCGTAG-3'     | Digest AE2a PΔX - <i>SbfI/BsrGI</i> and<br>PCR fragment - <i>SbfI/BsrGI</i>                                                                     | PΔX        |
| AE1 <sub>(1-612)</sub> /AE2 <sub>(921-1237)</sub>                            | 8  | AE2.F2<br>SZ-18<br>AE1.RI<br>AE1-F1         | AE2a<br>kAE1                                                                                                  | 1942-1962/<br>2943-2963<br>3876-3896<br>2943-2963/<br>1942-1962<br>1219-1242 | 5'-CTACGAAAGTTCAAGAACAGC-<br>CGGTTCTTCCCTGGCCGGATC-3'<br>5'-CTACACAGGCATGGGCATCTC-3'<br>5'-GATCCGGCCAGGGAAGAACCG-<br>GCTGTTCTTGAACCTTTCGTAG-3'<br>5'-CTAGACTGCTTCATCTACGAG-3'     | PCR fragment digested with<br><i>EcoRV/BsrGI</i> , kAE1 digested with<br><i>EcoRI/EcoRV</i> and AE2a (PXT7)<br>digested with <i>EcoRI/BsrGI</i> | PXt7       |
| *AE2 <sub>(1-703)</sub> /AE1 <sub>(423-929)</sub>                            | 9  |                                             |                                                                                                               |                                                                              | (Zhang <i>et al.</i> , 1996)                                                                                                                                                      |                                                                                                                                                 |            |
| AE1-AE2(EC3)                                                                 | 10 | CK-AE1-R1<br>AE1-F1<br>CK-AE1-F2<br>SZ-18   | AE1<br>AE1<br>AE2<br>AE2                                                                                      | 1794-1818<br>/2714-2732<br>1219-1242<br>1796-1818/<br>2714-2734<br>3876-3896 | 5'-GCCATGGAGTGGGTGCTC-CTGG<br>AAAATCTTGATCAGCTTGGAG-3'<br>5'-GCCAAGCCAGACCCCAACTTGTAC-3'<br>5'-CCAAGCTGATCAAGATTTTCCAG-<br>GAGCACCCACTCCATGGCTG-3'<br>5'-CTACACAGGCATGGGCATCTC-3' | Digest kAE1-pBL and PCR fragment<br>with <i>StuI</i> and <i>SphI</i>                                                                            | pBL<br>PΔX |
| AE2-AE1(EC3)                                                                 | 11 | SZ-26<br>CK-AE2-R1<br>AE1.3PR1<br>CK-AE2-F2 | AE2<br>AE2<br>AE1<br>AE1                                                                                      | 1819-1835/<br>2715-2683<br>2949-2934<br>2692-2714/<br>1819-1835              | 5'-TGTTGTAGTGGGTAGTC-CTGGAAG<br>ATCTTGATCAGCTTATAGAAG-3'<br>5'-GAAAGTGGAGTGGTTG-3'<br>5'-ATAAGCTGATCAAGATCTTCC<br>AG-GACTACCCACTACAACAG                                           | Digest AE2a PΔX and PCR fragment<br>with <i>StuI</i> and <i>BsrGI</i>                                                                           | PΔX<br>pBL |

**Supplemental Table 1. Construction of AE chimeras.**
