# Supplementary material
Source: PubMed Central journal article supplement (PMC2277056)
Supplement: jphysiol_2007.136119_3.pdf [file jphysiol_2007.136119_3.pdf]

| <b>Construct</b> | <b>Chimera aa residue</b>                                                    | <b>Length of substituted AE2 TMD segment (aa)</b> | <b>% aa seq. identity with corresponding AE1 seq.</b> |
|------------------|------------------------------------------------------------------------------|---------------------------------------------------|-------------------------------------------------------|
| 3                | AE2 <sub>(1-1119)</sub> /AE1 <sub>(812-929)</sub>                            | 118                                               | <b>62%</b>                                            |
| 4                | AE2 <sub>(1-920)</sub> /AE1 <sub>(613-929)</sub>                             | 317                                               | 67%                                                   |
| 5                | AE2 <sub>(1-920)</sub> /AE1 <sub>(613-811)</sub> /AE2 <sub>(1120-1237)</sub> | 199                                               | 70%                                                   |
| 6                | AE2 <sub>(1-703)</sub> /AE1 <sub>(423-811)</sub> /AE2 <sub>(1120-1237)</sub> | 416                                               | 67%                                                   |
| 7                | AE2 <sub>(1-703)</sub> /AE1 <sub>(423-612)</sub> /AE2 <sub>(921-1237)</sub>  | 218                                               | <b>65%</b>                                            |
| 8                | AE1 <sub>(1-612)</sub> /AE2 <sub>(921-1237)</sub>                            | 317                                               | 67%                                                   |
| 9                | AE2 <sub>(1-703)</sub> /AE1 <sub>(423-929)</sub>                             | 534                                               | 66%                                                   |
| 10               | AE2-AE1(EC3)                                                                 | 50                                                | divergent                                             |
| 11               | AE1-AE2(EC3)                                                                 |                                                   | divergent                                             |

**Supplemental Table 2. Comparing sequence identity of AE transmembrane segments**
