# Supplementary material
Source: PubMed Central journal article supplement (PMC2277056)
Supplement: jphysiol_2007.136119_4.pdf [file jphysiol_2007.136119_4.pdf]

| Construct                                                                    |           | cRNA<br>(ng) | Basal <sup>36</sup> Cl <sup>-</sup> flux       |       |    | Inhibition by pH <sub>o</sub> |       |    | Inhibition by pH <sub>i</sub><br>(Cl <sup>-</sup> /Cl <sup>-</sup> exchange) |       |    | Stimulation by NH <sub>4</sub> <sup>+</sup>     |       |    | Inhibition by calmidazolium               |       |    |
|------------------------------------------------------------------------------|-----------|--------------|------------------------------------------------|-------|----|-------------------------------|-------|----|------------------------------------------------------------------------------|-------|----|-------------------------------------------------|-------|----|-------------------------------------------|-------|----|
|                                                                              |           |              | kmin <sup>-1</sup><br>(pH <sub>o</sub><br>7.4) | s.e.m | n  | [pH <sub>o(50)</sub> ]        | s.e.m | n  | k (+butyrate)<br>k(post-<br>butyrate)(%)                                     | s.e.m | n  | NH <sub>4</sub> <sup>+</sup> (%)<br>stimulation | s.e.m | n  | Calmidazolium<br>(10μM)<br>Inhibition (%) | s.e.m | n  |
| AE2 wt                                                                       |           | 10           | 0.035                                          | 0.004 | 30 | 6.90                          | 0.06  | 21 | 16.7                                                                         | 3.2   | 13 | 178.4                                           | 13.8  | 14 | 33.4                                      | 2.4   | 14 |
| AE2a Δ659 (660-1237)                                                         | <b>1</b>  | 0.5          | 0.033                                          | 0.005 | 13 | 6.36                          | 0.07  | 8  | 96.1                                                                         | 3.8   | 4  |                                                 |       |    |                                           |       |    |
| *AE1 <sub>(1-422)</sub> /AE2 <sub>(704-1237)</sub>                           | <b>2</b>  | 0.5          | 0.042                                          | 0.007 | 13 |                               |       |    | 42.3                                                                         | 3.9   | 25 |                                                 |       |    |                                           |       |    |
| AE2 <sub>(1-1119)</sub> /AE1 <sub>(812-929)</sub>                            | <b>3</b>  | 1-10         | 0.022                                          | 0.002 | 21 | 7.24                          | 0.10  | 11 | 20.2                                                                         | 2.5   | 13 | 132.5                                           | 10.1  | 13 | 57.7                                      | 2.7   | 13 |
| AE2 <sub>(1-920)</sub> /AE1 <sub>(613-929)</sub>                             | <b>4</b>  | 5-10         | 0.038                                          | 0.003 | 36 |                               |       |    | 82.4                                                                         | 3.1   | 15 | 107.7                                           | 2.7   | 15 | 47.7                                      | 2.5   | 14 |
| AE2 <sub>(1-920)</sub> /AE1 <sub>(613-811)</sub> /AE2 <sub>(1120-1237)</sub> | <b>5</b>  | 25           | 0.003                                          | 0.001 | 6  |                               |       |    | 87.2                                                                         | 9.6   | 8  |                                                 |       |    |                                           |       |    |
| AE2 <sub>(1-703)</sub> /AE1 <sub>(423-811)</sub> /AE2 <sub>(1120-1237)</sub> | <b>6</b>  | 10-14        | 0.021                                          | 0.002 | 26 |                               |       |    | 96.2                                                                         | 3.0   | 7  | 88.5                                            | 2.5   | 10 | 33.7                                      | 1.2   | 9  |
| AE2 <sub>(1-703)</sub> /AE1 <sub>(423-612)</sub> /AE2 <sub>(921-1237)</sub>  | <b>7</b>  | 10-14        | 0.027                                          | 0.004 | 25 |                               |       |    | 100.7                                                                        | 2.6   | 17 | 89.9                                            | 4.2   | 7  | 41.7                                      | 2.4   | 9  |
| AE1 <sub>(1-612)</sub> /AE2 <sub>(921-1237)</sub>                            | <b>8</b>  | 10           | 0.024                                          | 0.002 | 34 |                               |       |    | 112.9                                                                        | 4.8   | 18 | 84.1                                            | 2.5   | 13 | 33.5                                      | 2.7   | 12 |
| *AE2 <sub>(1-703)</sub> /AE1 <sub>(423-929)</sub>                            | <b>9</b>  | 25           | 0.015                                          | 0.006 | 10 |                               |       |    | 108.2                                                                        | 10.5  | 5  |                                                 |       |    |                                           |       |    |
| AE1-AE2(EC3)                                                                 | <b>10</b> | 10           | 0.025                                          | 0.008 | 6  | 5.65                          | 0.12  | 17 | 85.2                                                                         | 4.1   | 9  |                                                 |       |    |                                           |       |    |
| AE2-AE1(EC3)                                                                 | <b>11</b> | 10           | 0.020                                          | 0.005 | 5  | 6.71                          | 0.09  | 22 | 28.7                                                                         | 4.9   | 8  |                                                 |       |    |                                           |       |    |
| eAE1                                                                         |           | 10           | 0.037                                          | 0.005 | 16 | 5.59                          | 0.25  | 10 | 86.9                                                                         | 5.8   | 9  | 91.1                                            | 2.0   | 7  | 99.9                                      | 6.3   | 13 |

**Supplemental Table 3.** <sup>36</sup>Cl<sup>-</sup> efflux data for AE chimeras.
