# Supplementary material
Source: PubMed Central journal article supplement (PMC2277056)

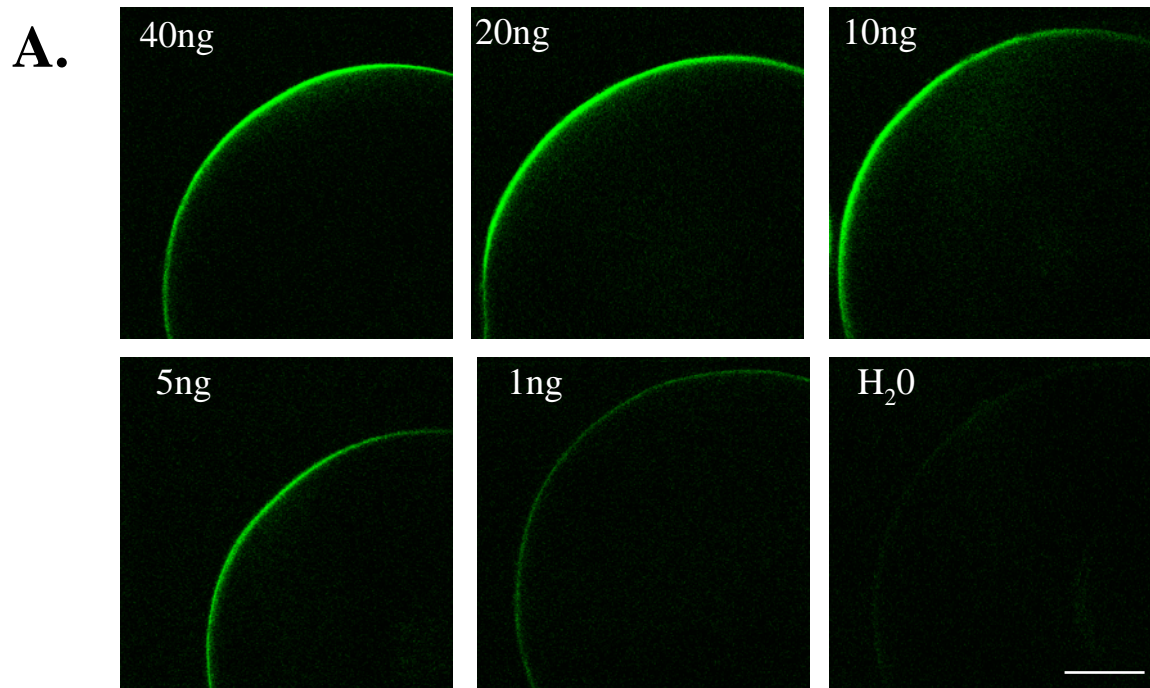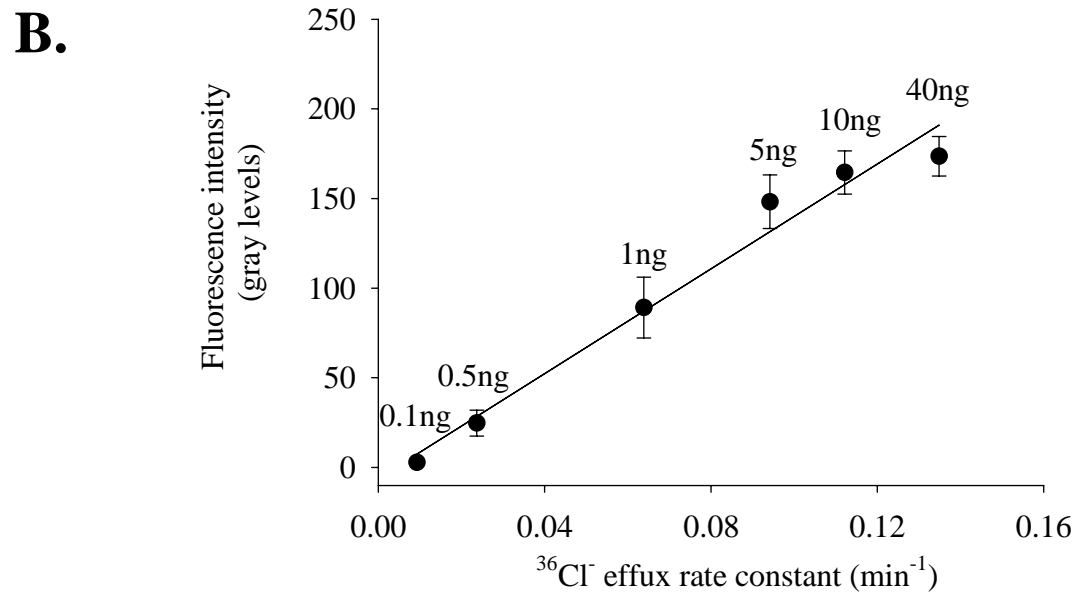

Supplement: jphysiol_2007.136119_1.pdf [file jphysiol_2007.136119_1.pdf]
